# Supplementary material for: High-throughput production of LuAG-based highly luminescent thick film scintillators for radiation detection and imaging
Source: PubMed Central journal article supplement (PMC9652359; doi:10.1038/s41598-022-23839-w), 2022-11-11
Supplement: 41598_2022_23839_MOESM1_ESM.pdf [file 41598_2022_23839_MOESM1_ESM.pdf]

## SUPPLEMENTALY INFORMATION

### High-throughput Production of LuAG-based Highly Luminescent Thick Film Scintillators for Radiation Detection and Imaging

Shogen Matsumoto<sup>1</sup>, Akihiko Ito<sup>1,\*</sup>

<sup>1</sup>Graduate School of Environment and Information Sciences, Yokohama National University, 79-7, Tokiwadai, Hodogaya-Ku, Yokohama 240-8501, Japan

\*Corresponding author: E-mail: ito-akihiko-xr@ynu.ac.jp, Tel: +81-45-339-3354

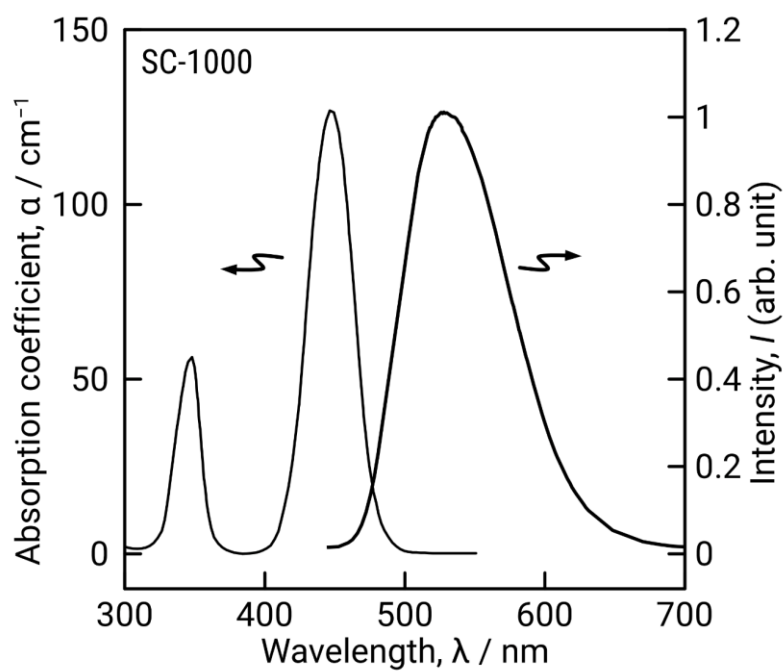

**Supplementary Fig. S1** Optical absorption and photoluminescence spectra of Ce<sup>3+</sup>:LuAG single crystal (SC-1000).

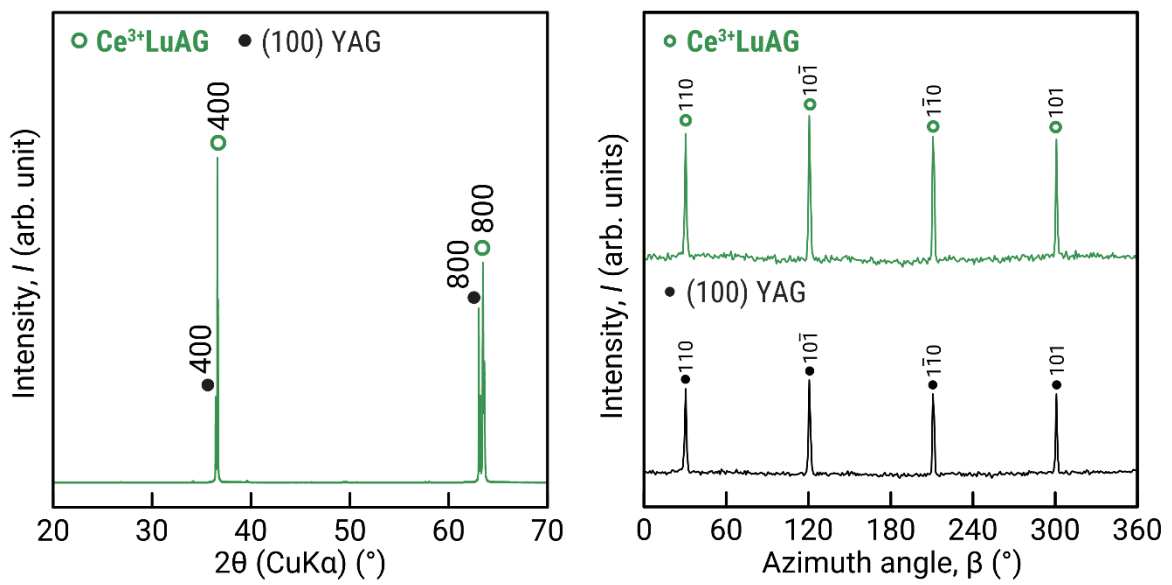

**Supplementary Fig. S2**  $\theta$ - $2\theta$  XRD pattern and  $\phi$ -scan XRD patterns at LuAG {110} and YAG {110} planes.

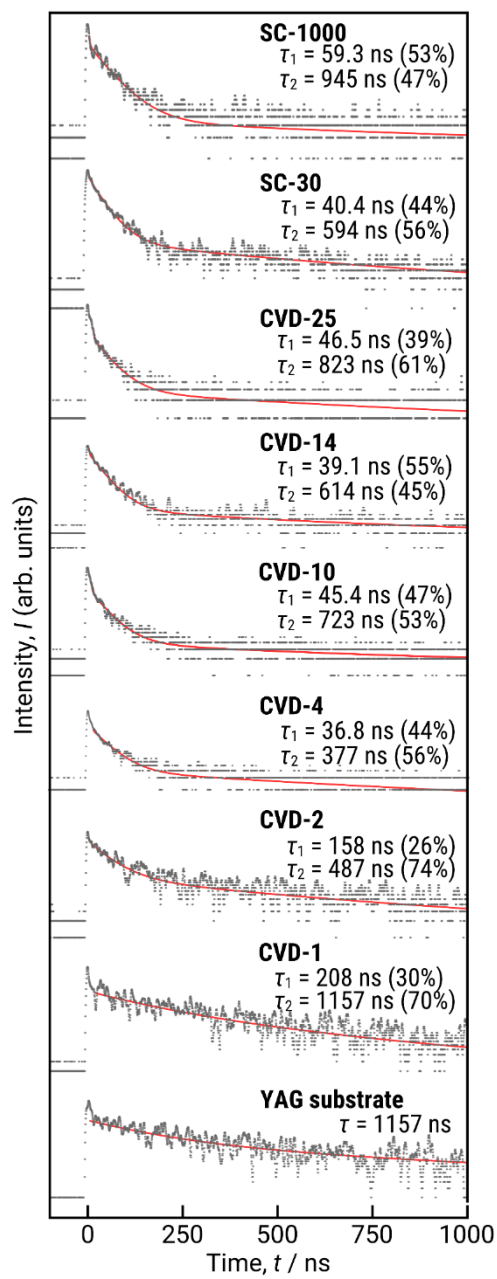

**Supplementary Fig. S3**  $\alpha$ -particle-induced scintillation decay profile of raw YAG substrate, CVD-1, CVD-2, CVD-4, CVD-10, CVD-14, CVD-25, SC-30, and SC-1000.

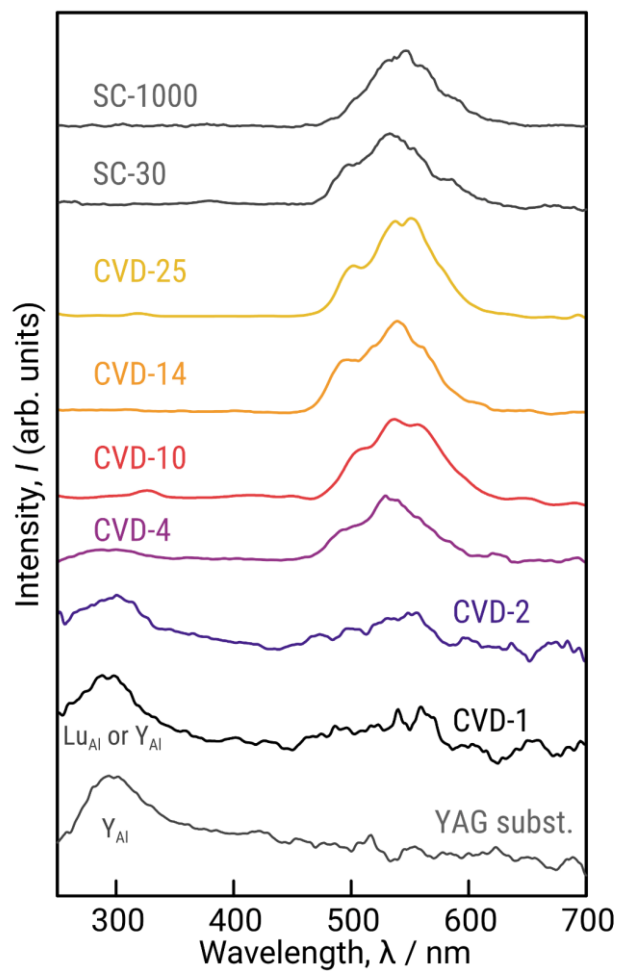

**Supplementary Fig. S4**  $\alpha$ -particle-induced scintillation spectra of raw YAG substrate, CVD-1, CVD-2, CVD-4, CVD-10, CVD-14, CVD-25, SC-30, and SC-1000.

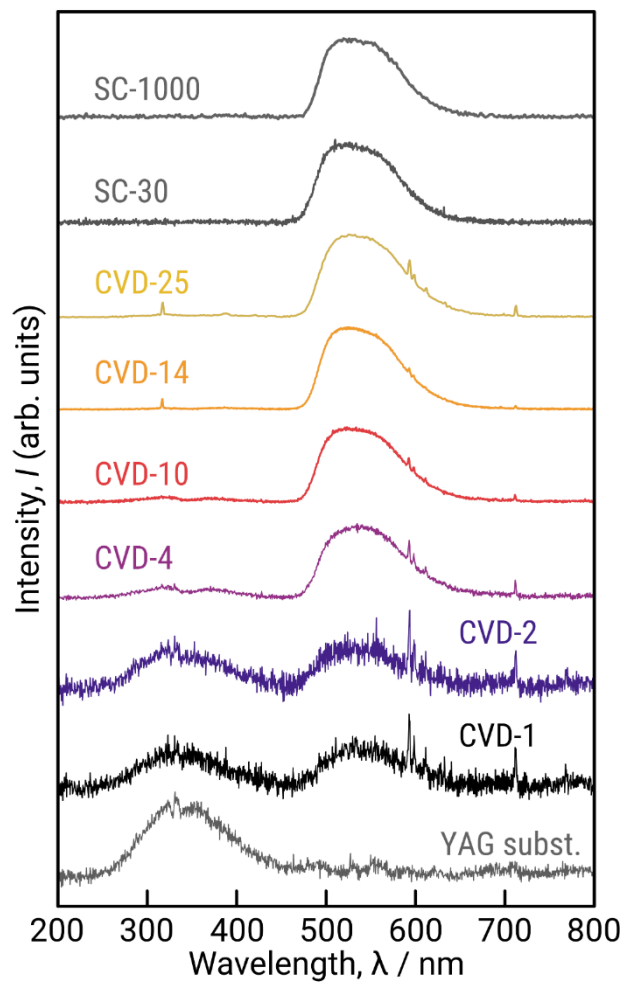

**Supplementary Fig. S5** X-ray-induced scintillation spectra of raw YAG substrate, CVD-1, CVD-2, CVD-4, CVD-10, CVD-14, CVD-25, SC-30, and SC-1000.

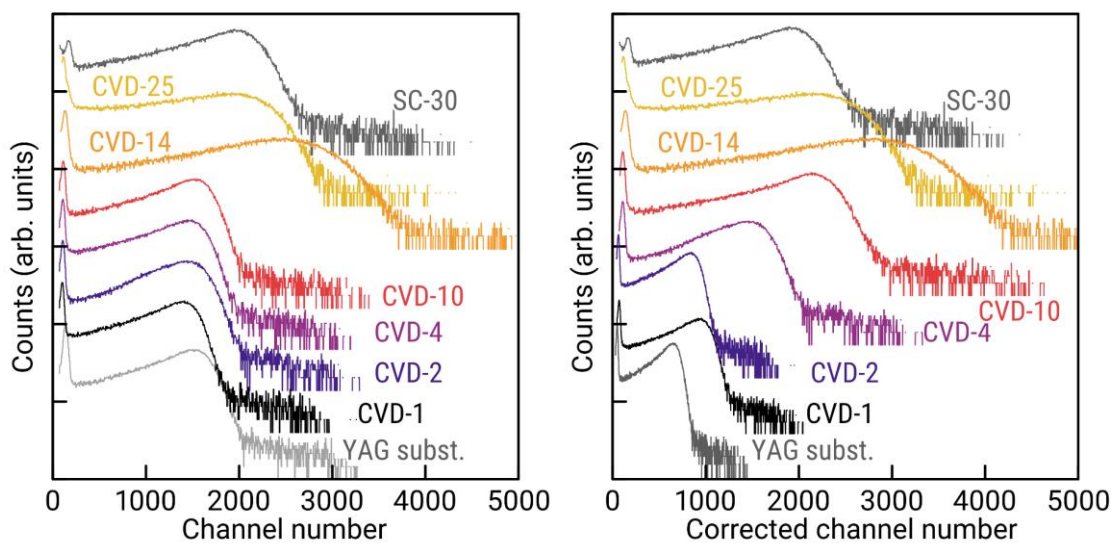

**Supplementary Fig. S6**  $\alpha$ -particle-induced pulse height measurements before and after correction for the PMT quantum efficiency of as-received YAG substrate, CVD-1, CVD-2, CVD-4, CVD-10, CVD-14, CVD-25, and SC-30. SC-30 was used as the standard for correction.

**Table S1** Summary of thickness and scintillation properties of CVD-Ce<sup>3+</sup>:LuAG thick film scintillators and LuAG single crystal.

| Sample     | Thickness<br>/ $\mu\text{m}$ | Fast decay<br>component<br>/ ns | Slow decay<br>component<br>/ ns | Light yield<br>/ photons 5.5<br>MeV <sup>-1</sup> | Energy<br>resolution at 5.5<br>MeV- $\alpha$ -ray (%) |
|------------|------------------------------|---------------------------------|---------------------------------|---------------------------------------------------|-------------------------------------------------------|
| YAG subst. | -                            | 1157                            | -                               | 9000                                              | 20.3                                                  |
| CVD-1      | 0.8                          | 208 (30%)                       | 1157 (70%)                      | 10000                                             | 22.3                                                  |
| CVD-2      | 1.8                          | 158 (26%)                       | 487 (74%)                       | 9000                                              | 22.7                                                  |
| CVD-4      | 3.9                          | 36.8 (44%)                      | 377 (56%)                       | 16000                                             | 25.4                                                  |
| CVD-10     | 10.0                         | 45.4 (47%)                      | 723 (53%)                       | 24000                                             | 22.2                                                  |
| CVD-14     | 13.9                         | 39.1 (55%)                      | 614 (45%)                       | 31000                                             | 20.1                                                  |
| CVD-25     | 24.7                         | 46.5 (39%)                      | 823 (61%)                       | 27000                                             | 23.1                                                  |
| SC-30      | 34                           | 40.4 (44%)                      | 594 (56%)                       | 21000                                             | 24.3                                                  |
| SC-1000    | 1000                         | 59.3 (53%)                      | 945 (47%)                       | 17000                                             | 20.5                                                  |
